# Supplementary material
Source: HighWire-hosted journal article supplement (https://erj.ersjournals.com/content/50/4/1700800)
Supplement: inline-supplementary-material-1 [file inline-supplementary-material-1.pdf]

## Table of Contents Supplementary Appendix

|                        |             |
|------------------------|-------------|
| <b>List of Authors</b> | <b>2</b>    |
| <b>Methods</b>         | <b>3-4</b>  |
| <b>Figures</b>         | <b>5-8</b>  |
| <b>Tables</b>          | <b>9-27</b> |
| <b>References</b>      | <b>28</b>   |

### List of Authors

**Jose L. Gomez<sup>1</sup>, Xiting Yan<sup>1</sup>, Carole T. Holm<sup>1</sup>, Nicole Grant<sup>1</sup>, Qing Liu<sup>1</sup>, Lauren Cohn<sup>1</sup>, Vera Nezgovorova<sup>1</sup>, Deborah A. Meyers<sup>2</sup>, Eugene R. Bleecker<sup>2</sup>, Gina M. Crisafi<sup>3</sup>, Nizar N. Jarjour<sup>3</sup> for the SARP Investigators, Linda Rogers<sup>4</sup>, Joan Reibman<sup>4</sup>, and Geoffrey L. Chupp<sup>1</sup>**

<sup>1</sup> Section of Pulmonary, Critical Care Medicine and Sleep and Department of Internal Medicine, Yale University School of Medicine, New Haven, CT

<sup>2</sup> Center for Human Genomics and Personalized Medicine, Wake Forest School of Medicine, Winston-Salem, NC

<sup>3</sup> Section of Pulmonary and Critical Care Medicine, University of Wisconsin School of Medicine, Madison, WI

<sup>4</sup> Department of Medicine and Environmental Medicine, New York University School of Medicine, New York, NY.

## Methods

**Subjects.** Pulmonary function testing included baseline pre-bronchodilator spirometry and responsiveness to 2-8 puffs of short-acting beta-agonists. Atopy was assessed by skin prick testing and measurement of serum total immunoglobulin E (IgE). Fraction of exhaled nitric oxide (FeNO) was measured using a NIOX MINO device (Aerocrine, New Providence, NJ) at a constant flow rate. Blood was collected for complete blood count (CBC), IgE level quantitation (Healthpoint Diagnostix, Lincolnshire, IL) and additional analyses described below.

Medication use was recorded at the time of the study visit in all three cohorts and represented the current, stable dose of maintenance inhalers and oral therapies, including oral corticosteroids and leukotriene antagonists.

**Measurement of Serum and Sputum YKL-40 Levels.** Average values from duplicate measurements were used. Duplicate samples with coefficients of variation (CV) greater than 20% were re-assayed. The mean CV for all samples was 10%. The limit of detection was 5.4 ng/mL. Values under the limit of detection were defaulted to 0 ng/mL.

**Sputum Induction and gene expression measurements.** Using inhaled hypertonic saline as previously described. (1) Mucus plugs were removed using a dissecting microscope and washed to remove squamous cell contamination. The cellular and aqueous compartments were separated, and cell counts, cell differentials, and viability were determined (Diff-Quik and trypan blue exclusion). Aliquots of supernatants were stored until processing. Samples with >20% squamous cells were considered contaminated and were not processed further.

Total RNA was isolated from sputum cell pellets using the All-in-One purification kit (Norgen Biotek, Thorold, CAN), checked on an Agilent bioanalyzer and, if needed, treated again to remove DNA contamination (Qiagen, Gaithersburg, MD). Sputum RNA (10 ng) was amplified using the WT-Ovation Pico RNA Amplification System (NuGEN, San Carlos, CA) and processed per Affymetrix protocols. Samples were checked on an Agilent bioanalyzer. Samples with RNA integrity numbers less than 4.0 were rejected from the analysis. Purified total RNA from the sputum was processed for gene

expression using the Affymetrix HuGene 1.0 ST gene arrays following the manufacturer's protocols as previously described (Affymetrix, Santa Clara, CA). (2) The array data can be obtained from the GEO database (<http://www.ncbi.nlm.nih.gov/geo/>) under accession number GSE56396.

**Statistical Analysis.** The following variables were used in the cluster analysis (Table E1): baseline FEV1% predicted, baseline FVC% predicted, baseline FEV1/FVC ratio, FEV1% predicted and FVC% predicted after maximal bronchodilation with albuterol, % of FEV1 bronchodilator response, age of asthma onset (years), asthma duration (years), gender (binary), frequency of  $\beta$ -agonist use (none;  $\leq 1$  time weekly; 2-3 times weekly; 1-2 times daily; or  $\geq 3$  times daily), inhaled corticosteroid (ICS) dose (mcg/day) and serum YKL-40 (ng/mL). ICS dose reporting was standardized to equivalent fluticasone doses in mcg/day. The subjects included in this analysis were required to have complete data available for all these variables.

In the YCAAD cohort, Ward's minimum-variance hierarchical clustering method was performed with the serum YKL-40 levels and eleven discriminant features identified by SARP. (3) The C-index was used to identify a cutoff in the number of clusters. (4). Following the identification of the four YKL-40 clusters in YCAAD, the rpart package (version 4.1-9) was used to generate a classifier model for these clusters. The tree generated using this approach was pruned to avoid overfitting the data. The classifier presented in Supplemental Figure E1 was then used to assign clusters in the SARP and NYUBAR cohorts.

In the YCAAD cohort, sputum gene expression was analyzed with Genespring version 12.6 (Agilent Technologies, Santa Clara, CA) and MetaCore version 6.23 build 67496 (Thomson Reuters, New York, NY). A Type 2 gene expression signature in the sputum was generated with a previously described method that uses the mean of the combination of gene expression of IL-4, IL-5 and IL-13. (2, 5) Pairwise comparisons were performed between individuals in all YKL-40 clusters and a group of healthy controls (HC) that completed the YCAAD phenotyping protocol during the study period (September 2009 and June 2012). Transcripts with a fold change  $\geq 2$  were selected, and an unpaired

Mann-Whitney test with a false discovery rate (FDR) of 10% was used to identify expression signatures in the airway. The single experiment MetaCore workflow was used for biological pathway and network analyses of differentially expressed transcripts identified in the pairwise comparison analyses between each YKL-40 cluster and the HC group, as described above. Enrichment analyses with an FDR-adjusted p-value  $<0.05$  were considered significant.

## Figures

**Figure E1.** YKL-40 Asthma Cluster Classifier

**Abbreviations:**

FEV1: Forced Expiratory Volume 1 Second; BD: Bronchodilator; BDR: Bronchodilator Response.

**Figure E2.** Common Transcripts in YKL-40 Clusters C3 and C4

**Abbreviations:**

C3: Cluster 3; C4: Cluster 4; HC: Healthy Controls.

**Figure E3.** Innate and Adaptive Immunity Transcripts in YKL-40 Asthma Cluster 3 vs Healthy Controls

**Abbreviations:**

C3: Cluster 3; HC: Healthy Controls.



**Figure E4.** Interleukin-18 (IL-18) Pathway Transcripts in YKL-40 Asthma Cluster 4 vs Healthy

Controls

**Abbreviations:**

C4: Cluster 4; HC: Healthy Controls.

## Tables

**Table E1.** Twelve discriminating features in the YKL-40 asthma clusters

| Feature                                              | YCAAD<br>p-value      | SARP<br>p-value       | NYUBAR<br>p-value     |
|------------------------------------------------------|-----------------------|-----------------------|-----------------------|
| Gender (binary)                                      | $8.6 \times 10^{-13}$ | $2.2 \times 10^{-16}$ | $2.2 \times 10^{-16}$ |
| Age of onset (years)                                 | $5.8 \times 10^{-6}$  | $5.5 \times 10^{-5}$  | $3.9 \times 10^{-13}$ |
| Asthma duration (years)                              | $5.9 \times 10^{-5}$  | $1.6 \times 10^{-4}$  | $4.0 \times 10^{-8}$  |
| Baseline FEV1% predicted                             | $2.2 \times 10^{-16}$ | $1.2 \times 10^{-13}$ | $2.2 \times 10^{-16}$ |
| Baseline FVC% predicted                              | $2.2 \times 10^{-16}$ | $3.4 \times 10^{-8}$  | $3.3 \times 10^{-15}$ |
| Baseline FEV1/FVC                                    | $1.4 \times 10^{-7}$  | $2.1 \times 10^{-13}$ | $1.9 \times 10^{-14}$ |
| Maximal FEV1% predicted                              | $5.8 \times 10^{-16}$ | $1.9 \times 10^{-10}$ | $4.2 \times 10^{-16}$ |
| Maximal FVC% predicted                               | $4.1 \times 10^{-13}$ | $1.0 \times 10^{-6}$  | $8.5 \times 10^{-13}$ |
| Change in % predicted FEV1 post-bronchodilator (BDR) | 0.002                 | $7.7 \times 10^{-7}$  | 0.002                 |
| Frequency of $\beta$ -agonist use                    | $9.8 \times 10^{-5}$  | 0.16                  | 0.11                  |
| Inhaled corticosteroid dose (mcg/day)                | 0.0002                | 0.01*                 | $4.3 \times 10^{-7}$  |
| Serum YKL-40 (ng/mL)                                 | $2.4 \times 10^{-10}$ | 0.015                 | $9.9 \times 10^{-6}$  |

*Definition of abbreviations:* YCAAD: Yale Center for Asthma and Airways Disease; SARP: Severe Asthma Research Program; NYUBAR: New York University/Bellevue Asthma Registry; FEV1: Forced Expiratory Volume 1 Second; FVC: Forced Vital Capacity; BDR: Bronchodilator Response

\*By categorical group: No steroids; low-to-moderate inhaled corticosteroid (ICS); high ICS; systemic corticosteroids.

**Table E2.** Characteristics of the YKL-40 clusters in all three cohorts

|                           | Total cohort | Cluster 1   | Cluster 2    | Cluster 3    | Cluster 4    | p-value |
|---------------------------|--------------|-------------|--------------|--------------|--------------|---------|
| <b>All Cohorts</b>        | 664          | 365 (55%)   | 184 (28%)    | 49 (7%)      | 66 (10%)     |         |
| Female gender             | 472 (71%)    | 359 (98%)   | 37 (20%)     | 28 (57%)     | 48 (73%)     | <0.01   |
| Age of onset (years)      | 16 (6-30)    | 15 (7-27)   | 12 (5-27)    | 6 (3-20)     | 43 (36-52)   | <0.01   |
| Asthma duration (years)   | 18 (9-31)    | 16 (8-28)   | 19 (11-30)   | 36 (31-48)   | 11 (4-19)    | <0.01   |
| BMI                       | 28 (24-33)   | 27 (23-33)  | 27 (24-32)   | 31 (27-37)   | 31 (26-35)   | <0.01   |
| Obesity (BMI ≥30)         | 260 (39%)    | 130 (36%)   | 65 (35%)     | 28 (57%)     | 37 (56%)     | <0.01   |
| Severe by EPR-3           |              |             |              |              |              |         |
| FEV1 Pre-BD*              | 82 (68-93)   | 88 (79-97)  | 75 (65-89)   | 39 (31-48)   | 68 (53-76)   | <0.01   |
| FEV1 Post-BD*             | 88 (76-98)   | 92 (83-102) | 87 (77-96)   | 48 (41-54)   | 74 (64-82)   | <0.01   |
| Bronchodilator Response * | 5 (2-10)     | 4 (2-7)     | 9 (4-17)     | 6 (3-11)     | 6 (1-11)     | <0.01   |
| Serum YKL-40 (ng/mL)      | 55 (38-85)   | 49 (35-70)  | 55 (37-79)   | 78 (49-110)  | 125 (64-239) | <0.01   |
| Serum IgE (IU/mL)         | 120 (36-309) | 96 (29-252) | 172 (66-392) | 154 (40-301) | 118 (40-303) | 0.002   |

\*Percent of predicted

**Table E3.** YKL-40 asthma clusters vs SARP clusters demonstrate a different distribution of the cluster assignment ( $p < 0.001$ )

|                       | <b>YKL-40 Cluster 1</b> | <b>YKL-40 Cluster 2</b> | <b>YKL-40 Cluster 3</b> | <b>YKL-40 Cluster 4</b> |
|-----------------------|-------------------------|-------------------------|-------------------------|-------------------------|
| Denominator           | 354*                    | 184                     | 49                      | 65*                     |
| <b>SARP Cluster 1</b> | 18% (62)                | 11% (20)                | 0% (0)                  | 2% (1)                  |
| <b>SARP Cluster 2</b> | 63% (223)               | 43% (80)                | 0% (0)                  | 23% (15)                |
| <b>SARP Cluster 3</b> | 8% (28)                 | 13% (24)                | 4% (2)                  | 18% (12)                |
| <b>SARP Cluster 4</b> | 5% (19)                 | 20% (37)                | 8% (4)                  | 18% (12)                |
| <b>SARP Cluster 5</b> | 6% (22)                 | 13% (23)                | 88% (43)                | 38% (25)                |

\*Information to determine SARP cluster assignment was not available in nine C1 subjects and one C4 subject, all in NYUBAR. Combined number of individuals analyzed in the three cohorts: C1=365; C2=184; C3=49; C4=66.

**Table E4.** Demographic, physiologic and sputum characteristics of healthy controls

|                                                                                 | <b>Total cohort</b> |
|---------------------------------------------------------------------------------|---------------------|
| <b>Number of subjects</b>                                                       | 10                  |
| Age (years)                                                                     | 32 (25-42)          |
| Female gender                                                                   | 7 (70%)             |
| Race                                                                            |                     |
| White                                                                           | 10 (100%)           |
| Hispanic                                                                        | 0                   |
| BMI (kg/m <sup>2</sup> )                                                        | 23.9 (22.0-25.4)    |
| <b>Baseline lung function</b>                                                   |                     |
| FEV1% predicted                                                                 | 97 (92-102)         |
| FVC% predicted                                                                  | 103 (97-108)        |
| FEV1/FVC                                                                        | 78 (77-83)          |
| <b>Maximal lung function</b>                                                    |                     |
| FEV1% predicted                                                                 | 103 (91-108)        |
| FVC% predicted                                                                  | 104 (95-108)        |
| FEV1/FVC                                                                        | 81 (77-83)          |
| Change in % predicted FEV1                                                      | 3 (1-5)             |
| Atopy status                                                                    | 6 (60%)             |
| <b>Sputum characterization (n)</b>                                              |                     |
| Eosinophil-predominant sputum $\geq 2\%$                                        | 1                   |
| Neutrophil-predominant sputum $\geq 40\%$                                       | 3                   |
| Paucigranulocytic sputum<br>Eosinophils $< 2\%$ and neutrophils $< 40\%$        | 4                   |
| Mixed granulocytic sputum<br>Eosinophils $\geq 2\%$ and Neutrophils $\geq 40\%$ | 2                   |

Data are n (%) or median (interquartile range) unless otherwise specified.

**Definition of Abbreviations:** FEV1: Forced Expiratory Volume 1 second; FVC: Forced Vital Capacity

**Table E5.** Sputum transcriptome analysis: C1 vs Healthy Controls

| Probeset ID | FDR-adjusted p-value | p-value | Fold Change C1 vs HC | Gene Symbol                           |
|-------------|----------------------|---------|----------------------|---------------------------------------|
| 7934898     | 0.01                 | 0.00    | 3.36                 | ANKRD22                               |
| 8040080     | 0.01                 | 0.00    | 3.29                 | RSAD2                                 |
| 7917576     | 0.02                 | 0.01    | 3.08                 | GBP5                                  |
| 8049528     | 0.02                 | 0.01    | 2.88                 | LRRFIP1                               |
| 8058765     | 0.01                 | 0.00    | 2.85                 | FN1                                   |
| 8091511     | 0.01                 | 0.00    | 2.81                 | P2RY14                                |
| 8035779     | 0.03                 | 0.01    | 2.65                 | ZNF626///ZNF93///ZNF253               |
| 8146092     | 0.04                 | 0.02    | 2.55                 | IDO1                                  |
| 7917561     | 0.01                 | 0.00    | 2.51                 | GBP4                                  |
| 8160559     | 0.02                 | 0.01    | 2.50                 | DDX58                                 |
| 8112327     | 0.08                 | 0.08    | 2.50                 | CKS1B                                 |
| 7979698     | 0.04                 | 0.02    | 2.40                 | ATP6V1D                               |
| 8149126     | 0.04                 | 0.03    | 2.39                 | DEFA1B///DEFA3///DEFA1                |
| 8006594     | 0.03                 | 0.02    | 2.38                 | CCL18///CCL18                         |
| 8154233     | 0.02                 | 0.01    | 2.36                 | CD274                                 |
| 8068713     | 0.01                 | 0.00    | 2.29                 | MX1                                   |
| 8121515     | 0.01                 | 0.00    | 2.29                 | SLC16A10                              |
| 8036755     | 0.02                 | 0.01    | 2.26                 | CLC                                   |
| 8166500     | 0.02                 | 0.01    | 2.24                 | ZFX                                   |
| 7995783     | 0.00                 | 0.00    | 2.23                 | MT2A                                  |
| 8091141     | 0.02                 | 0.01    | 2.06                 | XRN1                                  |
| 8117219     | 0.08                 | 0.08    | 2.03                 | ACOT13                                |
| 8149097     | 0.02                 | 0.01    | 2.02                 | DEFB1                                 |
| 8017843     | 0.08                 | 0.08    | 2.02                 | SLC16A6                               |
| 8000636     | 0.06                 | 0.05    | 2.02                 |                                       |
| 8026490     | 0.06                 | 0.06    | -2.04                | UCA1                                  |
| 8015349     | 0.04                 | 0.03    | -2.06                | KRT19                                 |
| 7934997     | 0.01                 | 0.00    | -2.07                | PPP1R3C                               |
| 7954065     | 0.03                 | 0.01    | -2.11                | GPRC5A                                |
| 8120833     | 0.02                 | 0.01    | -2.17                | SH3BGRL2                              |
| 8100827     | 0.03                 | 0.02    | -2.27                | IGJ                                   |
| 7953775     | 0.01                 | 0.00    | -2.32                | A2ML1                                 |
| 7977621     | 0.02                 | 0.01    | -2.32                | NDRG2                                 |
| 8177931     | 0.06                 | 0.06    | -2.35                | MUC21                                 |
| 8118069     | 0.07                 | 0.06    | -2.36                | MUC21                                 |
| 8152703     | 0.01                 | 0.00    | -2.36                | FBXO32                                |
| 8100675     | 0.01                 | 0.00    | -2.36                | TMPRSS11A                             |
| 7902738     | 0.01                 | 0.00    | -2.38                | CLCA4                                 |
| 8015323     | 0.05                 | 0.05    | -2.39                | KRT13                                 |
| 7922414     | 0.05                 | 0.04    | -2.40                | SNORD76///GAS5                        |
| 7903414     | 0.05                 | 0.04    | -2.40                | AMY2B///AMY2A///AMY1C///AMY1B///AMY1A |

|         |      |      |       |                                       |
|---------|------|------|-------|---------------------------------------|
| 7903440 | 0.04 | 0.02 | -2.43 | AMY2B///AMY2A///AMY1C///AMY1B///AMY1A |
| 7918134 | 0.04 | 0.02 | -2.43 | AMY2B///AMY2A///AMY1C///AMY1B///AMY1A |
| 8126905 | 0.01 | 0.00 | -2.43 | CRISP3                                |
| 8037053 | 0.05 | 0.04 | -2.51 | CEACAM7                               |
| 8029086 | 0.07 | 0.06 | -2.57 | CEACAM5                               |
| 8043504 | 0.03 | 0.02 | -2.58 | MAL                                   |
| 8053797 | 0.02 | 0.01 | -3.03 |                                       |
| 8158167 | 0.01 | 0.00 | -3.04 | LCN2                                  |
| 8015060 | 0.02 | 0.01 | -3.06 | KRT24                                 |
| 8126820 | 0.01 | 0.01 | -3.13 | GPR110                                |
| 8176624 | 0.01 | 0.00 | -4.22 | DDX3Y                                 |
| 8095380 | 0.01 | 0.00 | -4.35 | TMPRSS11E                             |
| 7933327 | 0.00 | 0.00 | -6.87 | FAM25G///FAM25C///FAM25A              |

**Abbreviations:**

FDR: False Discovery Rate; HC: Healthy Controls.

**Table E6.** Enrichment analyses of the sputum transcriptome in C1 vs Healthy Controls**Enrichment by pathway maps**

| # | Maps                                      | Total | In Data | FDR   |
|---|-------------------------------------------|-------|---------|-------|
| 1 | Cytoskeleton remodeling_Keratin filaments | 36    | 4       | <0.01 |

**Enrichment by diseases (by biomarkers)**

| #  | Diseases                     | Total | In Data | FDR   |
|----|------------------------------|-------|---------|-------|
| 1  | Connective Tissue Diseases   | 2213  | 35      | <0.01 |
| 2  | Respiratory Tract Infections | 515   | 16      | <0.01 |
| 3  | Sjogren's Syndrome           | 507   | 15      | <0.01 |
| 4  | Xerostomia                   | 507   | 15      | <0.01 |
| 5  | Arthritis                    | 1650  | 26      | <0.01 |
| 6  | Colonic Diseases             | 4412  | 45      | <0.01 |
| 7  | Joint Diseases               | 1680  | 26      | <0.01 |
| 8  | Arthritis, Rheumatoid        | 1446  | 24      | <0.01 |
| 9  | Rheumatic Diseases           | 1563  | 25      | <0.01 |
| 10 | Dry Eye Syndromes            | 563   | 15      | <0.01 |

**Enrichment by GO processes**

| #  | Processes                          | Total | In Data | FDR   |
|----|------------------------------------|-------|---------|-------|
| 1  | immune response                    | 1761  | 28      | <0.01 |
| 2  | innate immune response             | 1211  | 21      | <0.01 |
| 3  | defense response                   | 2018  | 27      | <0.01 |
| 4  | keratinocyte differentiation       | 148   | 8       | <0.01 |
| 5  | antibacterial humoral response     | 65    | 6       | <0.01 |
| 6  | antimicrobial humoral response     | 67    | 6       | <0.01 |
| 7  | epidermal cell differentiation     | 224   | 9       | <0.01 |
| 8  | defense response to other organism | 559   | 13      | <0.01 |
| 9  | keratinization                     | 75    | 6       | <0.01 |
| 10 | epidermis development              | 408   | 11      | <0.01 |

**Enrichment by Process Networks**

| # | Networks                                                      | Total | In Data | FDR  |
|---|---------------------------------------------------------------|-------|---------|------|
| 1 | Cytoskeleton_Intermediate filaments                           | 81    | 4       | 0.01 |
| 2 | Immune response_Innate immune response to RNA viral infection | 85    | 4       | 0.01 |

**Abbreviations:**

FDR: False Discovery Rate.



**Table E7.** Sputum transcriptome analysis: C2 vs Healthy Controls

| Probeset ID | FDR-adjusted p-value | p-value | Fold Change C2 vs HC | Gene Symbol                                                                     |
|-------------|----------------------|---------|----------------------|---------------------------------------------------------------------------------|
| 8098439     | 0.05                 | 0.00    | 5.65                 | EPCAM                                                                           |
| 7975453     | 0.08                 | 0.04    | 3.77                 | SNORD56B                                                                        |
| 7914342     | 0.05                 | 0.01    | 3.56                 | FABP3                                                                           |
| 8149126     | 0.08                 | 0.04    | 3.52                 | DEFA1B///DEFA3///DEFA1                                                          |
| 8066493     | 0.05                 | 0.00    | 3.24                 | SLPI                                                                            |
| 8102800     | 0.09                 | 0.05    | 3.15                 | SLC7A11                                                                         |
| 7964927     | 0.05                 | 0.01    | 3.12                 | TSPAN8                                                                          |
| 7951034     | 0.08                 | 0.04    | 2.86                 | SNORA8///TAF1D                                                                  |
| 8091511     | 0.05                 | 0.01    | 2.59                 | P2RY14                                                                          |
| 8085716     | 0.05                 | 0.01    | 2.58                 | SATB1                                                                           |
| 8137709     | 0.06                 | 0.03    | 2.54                 | ZFAND2A                                                                         |
| 7943413     | 0.05                 | 0.00    | 2.54                 | BIRC3                                                                           |
| 7908347     | 0.06                 | 0.02    | 2.47                 | OCLM                                                                            |
| 8043995     | 0.06                 | 0.02    | 2.45                 | IL1R1                                                                           |
| 8023696     | 0.06                 | 0.02    | 2.31                 | SERPINB3                                                                        |
| 8124262     | 0.08                 | 0.04    | 2.28                 | TDP2                                                                            |
| 7963946     | 0.05                 | 0.00    | 2.25                 | MMP19                                                                           |
| 7906764     | 0.05                 | 0.01    | 2.23                 | HSPA6                                                                           |
| 7940191     | 0.05                 | 0.01    | 2.13                 | STX3                                                                            |
| 8016980     | 0.06                 | 0.02    | 2.09                 | MIR142                                                                          |
| 8124492     | 0.09                 | 0.05    | 2.08                 | HIST1H2BK                                                                       |
| 8133770     | 0.05                 | 0.01    | 2.07                 | CCDC146                                                                         |
| 8017212     | 0.10                 | 0.06    | 2.06                 | USP32                                                                           |
| 8014650     | 0.06                 | 0.03    | 2.04                 | LOC440434///NPEPPS                                                              |
| 8018902     | 0.05                 | 0.01    | 2.02                 | DNAH17                                                                          |
| 8121429     | 0.09                 | 0.05    | -2.01                | FIG4                                                                            |
| 8144758     | 0.05                 | 0.01    | -2.03                | ZDHHC2                                                                          |
| 8072946     | 0.10                 | 0.06    | -2.06                | EIF3L                                                                           |
| 8101429     | 0.07                 | 0.03    | -2.06                | PLAC8                                                                           |
| 7941505     | 0.06                 | 0.02    | -2.07                | CST6                                                                            |
| 8023191     | 0.09                 | 0.05    | -2.07                | SMAD2                                                                           |
| 8106193     | 0.05                 | 0.01    | -2.08                | UTP15                                                                           |
| 8133309     | 0.06                 | 0.02    | -2.08                | PMS2P9///PMS2P6///DTX2P1-UPK3BP1-PMS2P11///LOC441259///PMS2P5///PMS2L2///PMS2P1 |
| 7900576     | 0.09                 | 0.05    | -2.10                | PPIH                                                                            |
| 8143028     | 0.09                 | 0.05    | -2.10                | CHCHD3                                                                          |
| 7987369     | 0.05                 | 0.01    | -2.10                | DPH6                                                                            |
| 7964834     | 0.07                 | 0.03    | -2.28                | CPM                                                                             |
| 7904303     | 0.05                 | 0.00    | -2.28                | CD101                                                                           |
| 7939087     | 0.06                 | 0.02    | -2.32                | ARL14EP                                                                         |
| 8150266     | 0.05                 | 0.01    | -2.36                | LSM1                                                                            |

|         |      |      |       |                          |
|---------|------|------|-------|--------------------------|
| 8011826 | 0.08 | 0.04 | -2.38 | SCIMP                    |
| 7991357 | 0.09 | 0.05 | -2.41 | AP3S2                    |
| 8125775 | 0.06 | 0.03 | -2.42 | UQCC2                    |
| 7940473 | 0.05 | 0.00 | -2.65 | TMEM138                  |
| 7905220 | 0.07 | 0.03 | -2.91 | ECM1///ECM1              |
| 7927363 | 0.06 | 0.02 | -4.78 | FAM25G///FAM25C///FAM25A |
| 7933327 | 0.06 | 0.02 | -4.78 | FAM25G///FAM25C///FAM25A |

**Abbreviations:**

FDR: False Discovery Rate; HC: Healthy Controls.

**Table E8.** Enrichment analyses of the sputum transcriptome in C2 vs Healthy Controls**Enrichment by pathway maps**

| # | Maps                                        | Total | In Data | FDR   |
|---|---------------------------------------------|-------|---------|-------|
| 1 | Immune response_IL-5 signaling via JAK/STAT | 57    | 4       | <0.01 |

**Enrichment by diseases (by biomarkers)**

| #  | Diseases                     | Total | In Data | FDR   |
|----|------------------------------|-------|---------|-------|
| 1  | Hypersensitivity             | 1679  | 32      | <0.01 |
| 2  | Bronchial Diseases           | 1365  | 28      | <0.01 |
| 3  | Asthma                       | 1312  | 27      | <0.01 |
| 4  | Respiratory Hypersensitivity | 1319  | 27      | <0.01 |
| 5  | Hypersensitivity, Delayed    | 252   | 13      | <0.01 |
| 6  | Crohn's Disease              | 588   | 18      | <0.01 |
| 7  | Hypersensitivity, Immediate  | 1503  | 27      | <0.01 |
| 8  | Colitis, Ulcerative          | 666   | 18      | <0.01 |
| 9  | Dermatitis, Allergic Contact | 251   | 12      | <0.01 |
| 10 | Colitis                      | 689   | 18      | <0.01 |

**Enrichment by GO processes**

| #  | Processes                                           | Total | In Data | FDR   |
|----|-----------------------------------------------------|-------|---------|-------|
| 1  | immunoglobulin production                           | 91    | 7       | <0.01 |
| 2  | innate immune response in mucosa                    | 35    | 5       | <0.01 |
| 3  | production of molecular mediator of immune response | 110   | 7       | <0.01 |
| 4  | disruption of cells of other organism               | 40    | 5       | <0.01 |
| 5  | killing of cells of other organism                  | 40    | 5       | <0.01 |
| 6  | mismatch repair                                     | 42    | 5       | <0.01 |
| 7  | hematopoietic stem cell migration                   | 6     | 3       | <0.01 |
| 8  | regulation of T-helper 1 type immune response       | 45    | 5       | <0.01 |
| 9  | immune system process                               | 3154  | 33      | <0.01 |
| 10 | mucosal immune response                             | 49    | 5       | <0.01 |

**Enrichment by Process Networks**

| # | Networks                               | Total | In Data | FDR   |
|---|----------------------------------------|-------|---------|-------|
| 1 | Development_Regulation of angiogenesis | 222   | 8       | <0.01 |
| 2 | Development_Blood vessel morphogenesis | 228   | 6       | 0.02  |

**Abbreviations:**

FDR: False Discovery Rate.

**Table E9.** Common transcripts in the sputum transcriptome analysis: C3 & C4 vs Healthy Controls

| <b>FDR-adjusted p-value</b> | <b>Fold Change C3 vs HC</b> | <b>FDR-adjusted p-value</b> | <b>Fold Change C4 vs HC</b> | <b>Gene Symbol</b> | <b>Previous studies in asthma and airway biology</b> |
|-----------------------------|-----------------------------|-----------------------------|-----------------------------|--------------------|------------------------------------------------------|
| 0.02                        | 2.9                         | 0.05                        | 2.2                         | TNFAIP3            | (6-8)                                                |
| 0.02                        | 2.8                         | 0.02                        | 2.6                         | MIR21              | (9-11)                                               |
| 0.02                        | 2.8                         | 0.01                        | 2.9                         | HLA-DQA1           | (12, 13)                                             |
| 0.02                        | 2.6                         | 0.03                        | 2.4                         | IL1RAP             | (14)                                                 |
| 0.09                        | 2.6                         | 0.06                        | 3.5                         | SNORD56B           |                                                      |
| 0.03                        | 2.3                         | 0.06                        | 2                           | XPO6               |                                                      |
| 0.04                        | 2.3                         | 0.06                        | 2.2                         | RRN3P3             |                                                      |
| 0.04                        | 2.2                         | 0.04                        | 2.3                         | GPR97              |                                                      |
| 0.10                        | 2                           | 0.06                        | 2.6                         | CCL18              | (15-17)                                              |
| 0.05                        | -2.8                        | 0.04                        | -2.6                        | IGJ                |                                                      |
| 0.02                        | -6.4                        | 0.02                        | -7.5                        | RPS4Y1             |                                                      |

**Abbreviations:**

FDR: False Discovery Rate; HC: Healthy Controls.

**Table E10.** Sputum transcriptome analysis: C3 vs Healthy Controls

| Probeset ID | FDR-adjusted p-value | p-value | Fold Change C3 vs HC | Gene Symbol                         |
|-------------|----------------------|---------|----------------------|-------------------------------------|
| 8149126     | 0.02                 | 0.00    | 5.10                 | DEFA1B///DEFA3///DEFA1              |
| 7943158     | 0.02                 | 0.01    | 3.87                 | SCARNA9                             |
| 7934898     | 0.02                 | 0.00    | 3.48                 | ANKRD22                             |
| 7905079     | 0.02                 | 0.00    | 3.27                 | HIST2H2AA4///HIST2H2AC///HIST2H2AA3 |
| 7919619     | 0.02                 | 0.00    | 3.27                 | HIST2H2AA4///HIST2H2AC///HIST2H2AA3 |
| 7937335     | 0.02                 | 0.00    | 2.93                 | IFITM1                              |
| 8122265     | 0.02                 | 0.01    | 2.92                 | TNFAIP3                             |
| 7917576     | 0.04                 | 0.02    | 2.84                 | GBP5                                |
| 8145291     | 0.03                 | 0.01    | 2.79                 | SLC25A37                            |
| 8008885     | 0.02                 | 0.00    | 2.79                 | MIR21                               |
| 8118556     | 0.02                 | 0.00    | 2.76                 | HLA-DQA1                            |
| 8084794     | 0.02                 | 0.00    | 2.62                 | IL1RAP                              |
| 7975453     | 0.09                 | 0.07    | 2.58                 | SNORD56B                            |
| 8006123     | 0.04                 | 0.02    | 2.39                 | CPD                                 |
| 8043995     | 0.04                 | 0.03    | 2.31                 | IL1R1                               |
| 8097903     | 0.03                 | 0.01    | 2.30                 | TLR2                                |
| 7922889     | 0.02                 | 0.01    | 2.29                 | IVNS1ABP                            |
| 8000482     | 0.03                 | 0.02    | 2.28                 | XPO6                                |
| 8000192     | 0.04                 | 0.02    | 2.27                 | RRN3P3///RRN3P1///RRN3P2///RRN3     |
| 8080973     | 0.02                 | 0.00    | 2.26                 | PPP4R2                              |
| 8160531     | 0.03                 | 0.01    | 2.23                 | C9orf72                             |
| 7953749     | 0.04                 | 0.02    | 2.21                 | CLEC4D                              |
| 7996100     | 0.04                 | 0.03    | 2.21                 | GPR97                               |
| 8091778     | 0.06                 | 0.05    | 2.18                 | SCARNA7                             |
| 8011077     | 0.02                 | 0.00    | 2.18                 | PITPNA                              |
| 8125512     | 0.02                 | 0.01    | 2.16                 | TAP1///PSMB8-AS1                    |
| 8180061     | 0.02                 | 0.01    | 2.16                 | TAP1///PSMB8-AS1                    |
| 8152845     | 0.02                 | 0.00    | 2.14                 | FAM49B                              |
| 7995783     | 0.02                 | 0.00    | 2.14                 | MT2A                                |
| 8151711     | 0.03                 | 0.01    | 2.14                 | NBN                                 |
| 8009653     | 0.02                 | 0.00    | 2.13                 | CD300A                              |
| 7987180     | 0.04                 | 0.02    | 2.07                 | KATNBL1P6///KATNBL1                 |
| 8062927     | 0.05                 | 0.03    | 2.06                 | PI3                                 |
| 8006594     | 0.10                 | 0.08    | 2.04                 | CCL18///CCL18                       |
| 8088958     | 0.03                 | 0.01    | 2.04                 | GBE1                                |
| 8146934     | 0.04                 | 0.03    | 2.04                 | LY96                                |
| 8117106     | 0.03                 | 0.01    | 2.03                 | RNF144B                             |
| 7914603     | 0.04                 | 0.03    | 2.02                 | RNF19B                              |
| 7951034     | 0.06                 | 0.04    | 2.02                 | SNORA8///TAF1D                      |
| 8043993     | 0.02                 | 0.00    | 2.01                 | LOC100131131                        |
| 8116910     | 0.03                 | 0.01    | 2.00                 | HIVEP1                              |

|         |      |      |       |                          |
|---------|------|------|-------|--------------------------|
| 7952046 | 0.03 | 0.02 | -2.03 | MPZL2                    |
| 8152703 | 0.07 | 0.05 | -2.05 | FBXO32                   |
| 8148553 | 0.02 | 0.01 | -2.05 | LY6K                     |
| 7981724 | 0.06 | 0.04 | -2.08 | IGHG1///IGHD             |
| 8173941 | 0.08 | 0.06 | -2.34 | TSPAN6                   |
| 8163908 | 0.05 | 0.03 | -2.45 | GGTA1P                   |
| 7941505 | 0.02 | 0.00 | -2.49 | CST6                     |
| 8100827 | 0.05 | 0.03 | -2.77 | IGJ                      |
| 7899455 | 0.04 | 0.02 | -2.86 | PHACTR4                  |
| 7997188 | 0.07 | 0.05 | -3.12 | HP                       |
| 8116734 | 0.02 | 0.00 | -3.29 | LY86                     |
| 8095364 | 0.04 | 0.02 | -3.48 | TMPRSS11E                |
| 7927363 | 0.02 | 0.00 | -5.91 | FAM25G///FAM25C///FAM25A |
| 7933327 | 0.02 | 0.00 | -5.91 | FAM25G///FAM25C///FAM25A |
| 8176375 | 0.02 | 0.00 | -6.44 | RPS4Y1                   |
| 8100664 | 0.03 | 0.01 | -6.59 | TMPRSS11D                |
| 8176719 | 0.02 | 0.00 | -8.62 | EIF1AY                   |

**Abbreviations:**

FDR: False Discovery Rate; HC: Healthy Controls.

**Table E11.** Enrichment analyses of the sputum transcriptome in C3 vs Healthy Controls**Enrichment by pathway maps**

| #  | Maps                                                                        | Total | In Data | FDR   |
|----|-----------------------------------------------------------------------------|-------|---------|-------|
| 1  | NETosis in SLE                                                              | 31    | 4       | <0.01 |
| 2  | Immune response_Bacterial infections in normal airways                      | 49    | 4       | <0.01 |
| 3  | Immune response_HSP60 and HSP70/TLR signaling pathway                       | 54    | 4       | <0.01 |
| 4  | Inhibition of neutrophil migration by pro-resolving lipid mediators in COPD | 70    | 4       | 0.01  |
| 5  | IL-1 beta-dependent CFTR expression                                         | 31    | 3       | 0.01  |
| 6  | Immune response_TLR ligands                                                 | 34    | 3       | 0.01  |
| 7  | Cytoskeleton remodeling_Keratin filaments                                   | 36    | 3       | 0.01  |
| 8  | Th17 cells in CF (mouse model)                                              | 49    | 3       | 0.02  |
| 9  | Signal transduction_NF-kB activation pathways                               | 51    | 3       | 0.02  |
| 10 | TLRs-mediated IFN-alpha production by plasmacytoid dendritic cells in SLE   | 53    | 3       | 0.02  |

**Enrichment by diseases (By Biomarkers)**

| #  | Diseases                     | Total | In Data | FDR   |
|----|------------------------------|-------|---------|-------|
| 1  | Hypersensitivity             | 1535  | 41      | <0.01 |
| 2  | Hypersensitivity, Immediate  | 1362  | 35      | <0.01 |
| 3  | Bronchial Diseases           | 1223  | 33      | <0.01 |
| 4  | Lung Diseases, Obstructive   | 1640  | 38      | <0.01 |
| 5  | Asthma                       | 1172  | 32      | <0.01 |
| 6  | Respiratory Hypersensitivity | 1187  | 32      | <0.01 |
| 7  | Warts                        | 27    | 8       | <0.01 |
| 8  | Arthritis, Rheumatoid        | 1446  | 34      | <0.01 |
| 9  | Arthritis                    | 1650  | 36      | <0.01 |
| 10 | Rheumatic Diseases           | 1563  | 35      | <0.01 |

**Enrichment by GO processes**

| #  | Processes                            | Total | In Data | FDR   |
|----|--------------------------------------|-------|---------|-------|
| 1  | immune response                      | 1761  | 46      | <0.01 |
| 2  | immune system process                | 2863  | 54      | <0.01 |
| 3  | defense response                     | 2018  | 45      | <0.01 |
| 4  | innate immune response               | 1211  | 35      | <0.01 |
| 5  | immune effector process              | 655   | 23      | <0.01 |
| 6  | humoral immune response              | 258   | 15      | <0.01 |
| 7  | response to biotic stimulus          | 1216  | 28      | <0.01 |
| 8  | defense response to other organism   | 559   | 19      | <0.01 |
| 9  | response to other organism           | 1170  | 27      | <0.01 |
| 10 | response to external biotic stimulus | 1172  | 27      | <0.01 |

### Enrichment by Process Networks

| #  | Networks                                                      | Total | In Data | FDR   |
|----|---------------------------------------------------------------|-------|---------|-------|
| 1  | Inflammation_Innate inflammatory response                     | 180   | 9       | <0.01 |
| 2  | Chemotaxis                                                    | 137   | 7       | <0.01 |
| 3  | Development_Regulation of angiogenesis                        | 223   | 7       | 0.02  |
| 4  | Immune response_Antigen presentation                          | 197   | 6       | 0.03  |
| 5  | Immune response_T helper cell differentiation                 | 140   | 5       | 0.03  |
| 6  | Immune response_Innate immune response to RNA viral infection | 85    | 4       | 0.03  |
| 7  | Cell adhesion_Leucocyte chemotaxis                            | 205   | 6       | 0.03  |
| 8  | Autophagy_Autophagy                                           | 55    | 3       | 0.05  |
| 9  | Inflammation_Interferon signaling                             | 110   | 4       | 0.05  |
| 10 | Inflammation_IL-4 signaling                                   | 115   | 4       | 0.06  |

#### Abbreviations:

FDR: False Discovery Rate; GO: Gene Ontology.



**Table E12.** Sputum transcriptome analysis: C4 vs Healthy Controls

| <b>Probeset ID</b> | <b>FDR-adjusted p-value</b> | <b>p-value</b> | <b>Fold Change C4 vs HC</b> | <b>Gene Symbol</b>                                              |
|--------------------|-----------------------------|----------------|-----------------------------|-----------------------------------------------------------------|
| 7914342            | 0.02                        | 0.00           | 4.40                        | FABP3                                                           |
| 8036755            | 0.04                        | 0.01           | 4.33                        | CLC                                                             |
| 8091511            | 0.02                        | 0.00           | 4.10                        | P2RY14                                                          |
| 7961075            | 0.06                        | 0.03           | 3.74                        | CD69                                                            |
| 7908347            | 0.03                        | 0.01           | 3.70                        | OCLM                                                            |
| 7975453            | 0.06                        | 0.04           | 3.50                        | SNORD56B                                                        |
| 8058765            | 0.02                        | 0.00           | 3.25                        | FN1                                                             |
| 8044049            | 0.05                        | 0.02           | 3.16                        | IL18RAP                                                         |
| 8044035            | 0.04                        | 0.02           | 2.96                        | IL18R1                                                          |
| 8043981            | 0.03                        | 0.01           | 2.95                        | IL1R2                                                           |
| 8118556            | 0.01                        | 0.00           | 2.93                        | HLA-DQA1                                                        |
| 8040080            | 0.08                        | 0.06           | 2.83                        | RSAD2                                                           |
| 8125447            | 0.04                        | 0.02           | 2.82                        | HLA-DRB1///HLA-DQB1///HLA-DRB5///HLA-DRB4///HLA-DRB3///HLA-DRB1 |
| 8000636            | 0.04                        | 0.01           | 2.79                        |                                                                 |
| 7928999            | 0.04                        | 0.01           | 2.76                        | LIPN                                                            |
| 8006594            | 0.06                        | 0.03           | 2.64                        | CCL18///CCL18                                                   |
| 8008885            | 0.02                        | 0.00           | 2.57                        | MIR21                                                           |
| 8113591            | 0.05                        | 0.02           | 2.56                        | PGGT1B                                                          |
| 8084794            | 0.03                        | 0.01           | 2.44                        | IL1RAP                                                          |
| 8127987            | 0.05                        | 0.02           | 2.38                        | SNORD50A                                                        |
| 8055980            | 0.04                        | 0.01           | 2.38                        | CYTIP                                                           |
| 7953737            | 0.04                        | 0.02           | 2.37                        | CLEC6A                                                          |
| 7967322            | 0.08                        | 0.06           | 2.35                        | HCAR2///HCAR3                                                   |
| 7995552            | 0.03                        | 0.01           | 2.32                        | CYLD                                                            |
| 7956878            | 0.03                        | 0.01           | 2.31                        | IRAK3                                                           |
| 8027862            | 0.10                        | 0.08           | 2.28                        | FFAR2                                                           |
| 8113305            | 0.04                        | 0.02           | 2.27                        | CHD1                                                            |
| 7996100            | 0.04                        | 0.01           | 2.27                        | GPR97                                                           |
| 8000192            | 0.06                        | 0.03           | 2.23                        | RRN3P3///RRN3P1///RRN3P2///RRN3                                 |
| 8122265            | 0.05                        | 0.02           | 2.18                        | TNFAIP3                                                         |
| 7963946            | 0.02                        | 0.00           | 2.17                        | MMP19                                                           |
| 8014361            | 0.04                        | 0.01           | 2.17                        | CCL23                                                           |
| 8084173            | 0.02                        | 0.00           | 2.16                        | ATP11B                                                          |
| 7922404            | 0.08                        | 0.06           | 2.15                        | GAS5///SNORD80                                                  |
| 8064868            | 0.05                        | 0.02           | 2.13                        | GPCPD1                                                          |
| 7957186            | 0.08                        | 0.06           | 2.12                        | TBC1D15                                                         |
| 8113113            | 0.01                        | 0.00           | 2.08                        | KIAA0825                                                        |
| 8091141            | 0.04                        | 0.01           | 2.08                        | XRN1                                                            |
| 8019885            | 0.09                        | 0.06           | 2.07                        | SMCHD1                                                          |
| 8086498            | 0.02                        | 0.00           | 2.06                        | KIAA1143                                                        |

|         |      |      |       |                          |
|---------|------|------|-------|--------------------------|
| 8127234 | 0.04 | 0.01 | 2.03  | DST                      |
| 8084704 | 0.10 | 0.08 | 2.03  | EIF4A2                   |
| 7901299 | 0.06 | 0.04 | 2.03  | CMPK1                    |
| 8083260 | 0.06 | 0.04 | 2.02  | CPA3                     |
| 8149097 | 0.02 | 0.00 | 2.02  | DEFB1                    |
| 8066275 | 0.06 | 0.04 | 2.02  | LOC100127886             |
| 8068713 | 0.06 | 0.03 | 2.02  | MX1                      |
| 8000482 | 0.06 | 0.04 | 2.02  | XPO6                     |
| 8148293 | 0.09 | 0.06 | 2.01  | NSMCE2                   |
| 8126905 | 0.06 | 0.03 | -2.02 | CRISP3                   |
| 8176698 | 0.02 | 0.00 | -2.06 | TXLNGY                   |
| 8036777 | 0.01 | 0.00 | -2.06 | FBL                      |
| 7968234 | 0.07 | 0.05 | -2.08 | SNORA27                  |
| 7913237 | 0.04 | 0.01 | -2.08 | CAMK2N1                  |
| 7963555 | 0.09 | 0.06 | -2.11 | KRT78                    |
| 8044391 | 0.02 | 0.00 | -2.18 | MERTK                    |
| 8126820 | 0.10 | 0.08 | -2.21 | GPR110                   |
| 8037053 | 0.09 | 0.06 | -2.30 | CEACAM7                  |
| 8100827 | 0.04 | 0.01 | -2.61 | IGJ                      |
| 7905220 | 0.04 | 0.01 | -3.33 | ECM1///ECM1              |
| 7920252 | 0.06 | 0.03 | -3.37 | S100A7                   |
| 7933423 | 0.01 | 0.00 | -6.97 | FAM25G///FAM25C///FAM25A |
| 8176375 | 0.02 | 0.00 | -7.48 | RPS4Y1                   |

**Abbreviations:**

FDR: False Discovery Rate; HC: Healthy Controls.

**Table E13.** Enrichment analyses of the sputum transcriptome in C4 vs Healthy Controls**Enrichment by pathway maps**

| # | Maps                                            | Total | In Data | FDR  |
|---|-------------------------------------------------|-------|---------|------|
| 1 | SLE genetic marker-specific pathways in T cells | 101   | 5       | 0.02 |

**Enrichment by diseases (By Biomarkers)**

| #  | Diseases                                  | Total | In Data | FDR   |
|----|-------------------------------------------|-------|---------|-------|
| 1  | Polyendocrinopathies, Autoimmune          | 12    | 9       | <0.01 |
| 2  | Uveomeningoencephalitic Syndrome          | 15    | 9       | <0.01 |
| 3  | Hemoglobinuria, Paroxysmal                | 16    | 9       | <0.01 |
| 4  | Hemoglobinuria                            | 17    | 9       | <0.01 |
| 5  | Aortitis                                  | 7     | 7       | <0.01 |
| 6  | Peanut Hypersensitivity                   | 7     | 7       | <0.01 |
| 7  | Vulvar Lichen Sclerosus                   | 7     | 7       | <0.01 |
| 8  | Berylliosis                               | 18    | 9       | <0.01 |
| 9  | Jaundice                                  | 22    | 9       | <0.01 |
| 10 | Anti-Glomerular Basement Membrane Disease | 9     | 7       | <0.01 |

**Enrichment by GO processes**

| #  | Processes                                                                      | Total | In Data | FDR   |
|----|--------------------------------------------------------------------------------|-------|---------|-------|
| 1  | immune response                                                                | 1761  | 47      | <0.01 |
| 2  | innate immune response                                                         | 1211  | 37      | <0.01 |
| 3  | defense response                                                               | 2018  | 44      | <0.01 |
| 4  | immune system process                                                          | 2863  | 52      | <0.01 |
| 5  | protein-carbohydrate complex subunit organization                              | 8     | 7       | <0.01 |
| 6  | polysaccharide assembly with MHC class II protein complex                      | 8     | 7       | <0.01 |
| 7  | protein-carbohydrate complex assembly                                          | 8     | 7       | <0.01 |
| 8  | antigen processing and presentation of polysaccharide antigen via MHC class II | 8     | 7       | <0.01 |
| 9  | peptide antigen assembly with MHC class II protein complex                     | 11    | 7       | <0.01 |
| 10 | MHC class II protein complex assembly                                          | 11    | 7       | <0.01 |

**Enrichment by Process Networks**

| # | Networks                                  | Total | In Data | FDR  |
|---|-------------------------------------------|-------|---------|------|
| 1 | Inflammation_Innate inflammatory response | 180   | 7       | 0.01 |
| 2 | Immune response_Antigen presentation      | 197   | 7       | 0.01 |
| 3 | Inflammation_Interferon signaling         | 110   | 5       | 0.02 |
| 4 | Translation_Translation initiation        | 171   | 6       | 0.02 |
| 5 | Inflammation_IL-4 signaling               | 115   | 5       | 0.02 |

**Abbreviations:**

FDR: False Discovery Rate; GO: Gene Ontology.

## References

1. Pizzichini E, Pizzichini MM, Efthimiadis A, Hargreave FE, Dolovich J. Measurement of inflammatory indices in induced sputum: effects of selection of sputum to minimize salivary contamination. *Eur Respir J*. 1996;9(6):1174-80.
2. Yan X, Chu JH, Gomez J, Koenigs M, Holm C, He X, et al. Noninvasive Analysis of the Sputum Transcriptome Discriminates Clinical Phenotypes of Asthma. *Ann Am Thorac Soc*. 2016;13 Suppl 1:S104-5.
3. Moore WC, Meyers DA, Wenzel SE, Teague WG, Li H, Li X, et al. Identification of asthma phenotypes using cluster analysis in the Severe Asthma Research Program. *Am J Respir Crit Care Med*. 2010;181(4):315-23.
4. LJ H, JR L. A general statistical framework for assessing categorical clustering in free recall. *Psychological Bulletin* 1976. p. 1072-80.
5. Peters MC, Mekonnen ZK, Yuan S, Bhakta NR, Woodruff PG, Fahy JV. Measures of gene expression in sputum cells can identify TH2-high and TH2-low subtypes of asthma. *J Allergy Clin Immunol*. 2014;133(2):388-94.
6. Kang NI, Yoon HY, Lee YR, Won M, Chung MJ, Park JW, et al. A20 attenuates allergic airway inflammation in mice. *J Immunol*. 2009;183(2):1488-95.
7. Simpson LJ, Patel S, Bhakta NR, Choy DF, Brightbill HD, Ren X, et al. A microRNA upregulated in asthma airway T cells promotes TH2 cytokine production. *Nat Immunol*. 2014;15(12):1162-70.
8. Schuijs MJ, Willart MA, Vergote K, Gras D, Deswarte K, Ege MJ, et al. Farm dust and endotoxin protect against allergy through A20 induction in lung epithelial cells. *Science*. 2015;349(6252):1106-10.
9. Lu TX, Munitz A, Rothenberg ME. MicroRNA-21 is up-regulated in allergic airway inflammation and regulates IL-12p35 expression. *J Immunol*. 2009;182(8):4994-5002.
10. Lu TX, Hartner J, Lim EJ, Fabry V, Mingler MK, Cole ET, et al. MicroRNA-21 limits in vivo immune response-mediated activation of the IL-12/IFN-gamma pathway, Th1 polarization, and the severity of delayed-type hypersensitivity. *J Immunol*. 2011;187(6):3362-73.
11. Liu Y, Yang K, Shi H, Xu J, Zhang D, Wu Y, et al. MiR-21 modulates human airway smooth muscle cell proliferation and migration in asthma through regulation of PTEN expression. *Exp Lung Res*. 2015;41(10):535-45.
12. Pino-Yanes M, Gignoux CR, Galanter JM, Levin AM, Campbell CD, Eng C, et al. Genome-wide association study and admixture mapping reveal new loci associated with total IgE levels in Latinos. *J Allergy Clin Immunol*. 2015;135(6):1502-10.
13. Lasky-Su J, Himes BE, Raby BA, Klanderman BJ, Sylvia JS, Lange C, et al. HLA-DQ strikes again: genome-wide association study further confirms HLA-DQ in the diagnosis of asthma among adults. *Clin Exp Allergy*. 2012;42(12):1724-33.
14. Savenije OE, Mahachie John JM, Granell R, Kerkhof M, Dijk FN, de Jongste JC, et al. Association of IL33-IL-1 receptor-like 1 (IL1RL1) pathway polymorphisms with wheezing phenotypes and asthma in childhood. *J Allergy Clin Immunol*. 2014;134(1):170-7.
15. de Nadaï P, Charbonnier AS, Chenivresse C, Sénéchal S, Fournier C, Gilet J, et al. Involvement of CCL18 in allergic asthma. *J Immunol*. 2006;176(10):6286-93.
16. Kim HB, Kim CK, Iijima K, Kobayashi T, Kita H. Protein microarray analysis in patients with asthma: elevation of the chemokine PARC/CCL18 in sputum. *Chest*. 2009;135(2):295-302.
17. Gavala ML, Kelly EA, Esnault S, Kukreja S, Evans MD, Bertics PJ, et al. Segmental allergen challenge enhances chitinase activity and levels of CCL18 in mild atopic asthma. *Clin Exp Allergy*. 2013;43(2):187-97.
