# Supplementary material
Source: HighWire-hosted journal article supplement (https://erj.ersjournals.com/content/50/4/1700800)

# Figure E1. YKL-40 Asthma Cluster Classifier

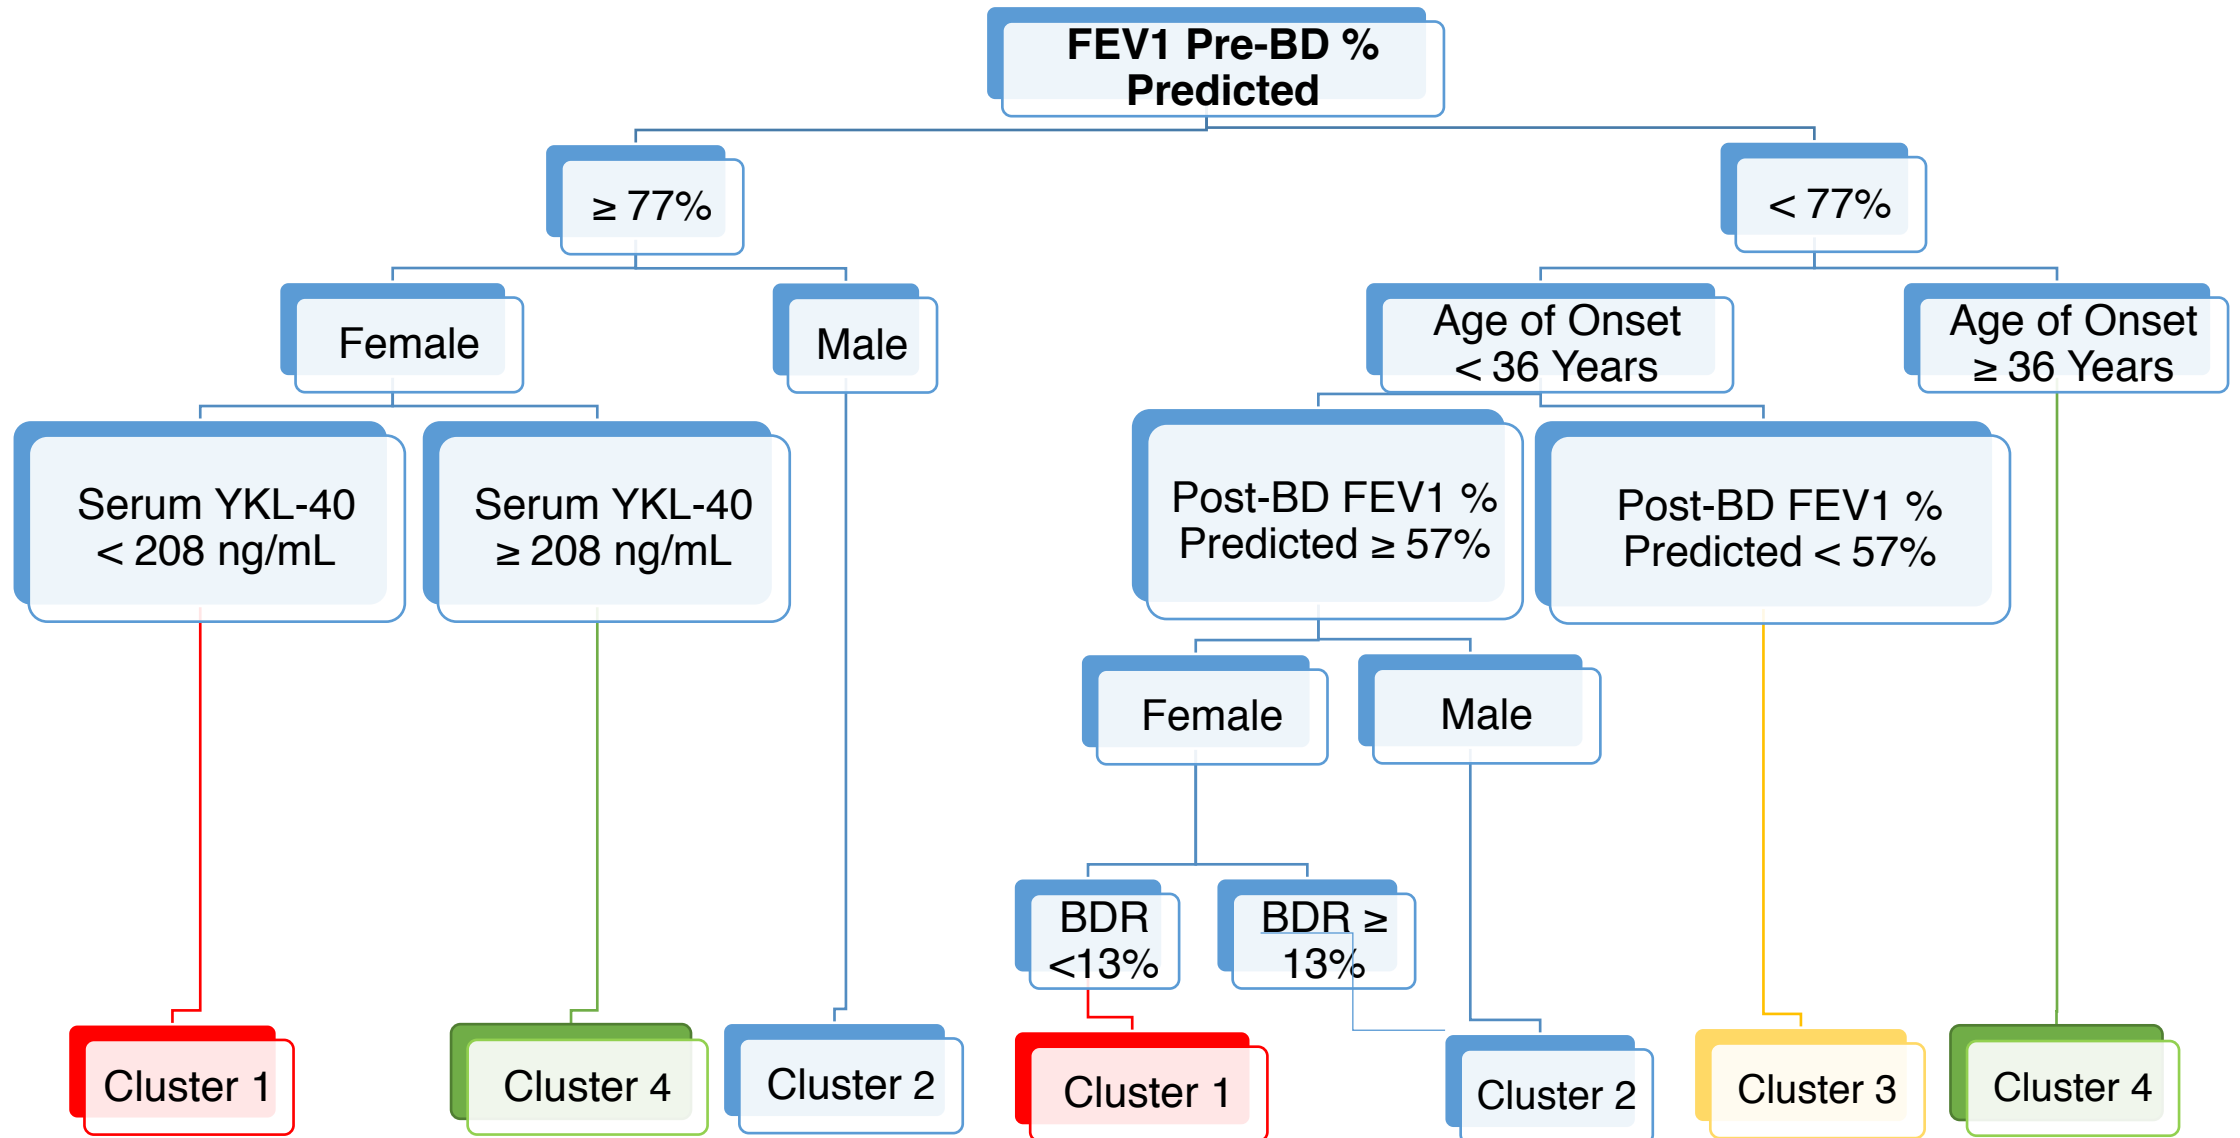

# Figure E2. Common Transcripts in YKL-40 Clusters C3 and C4

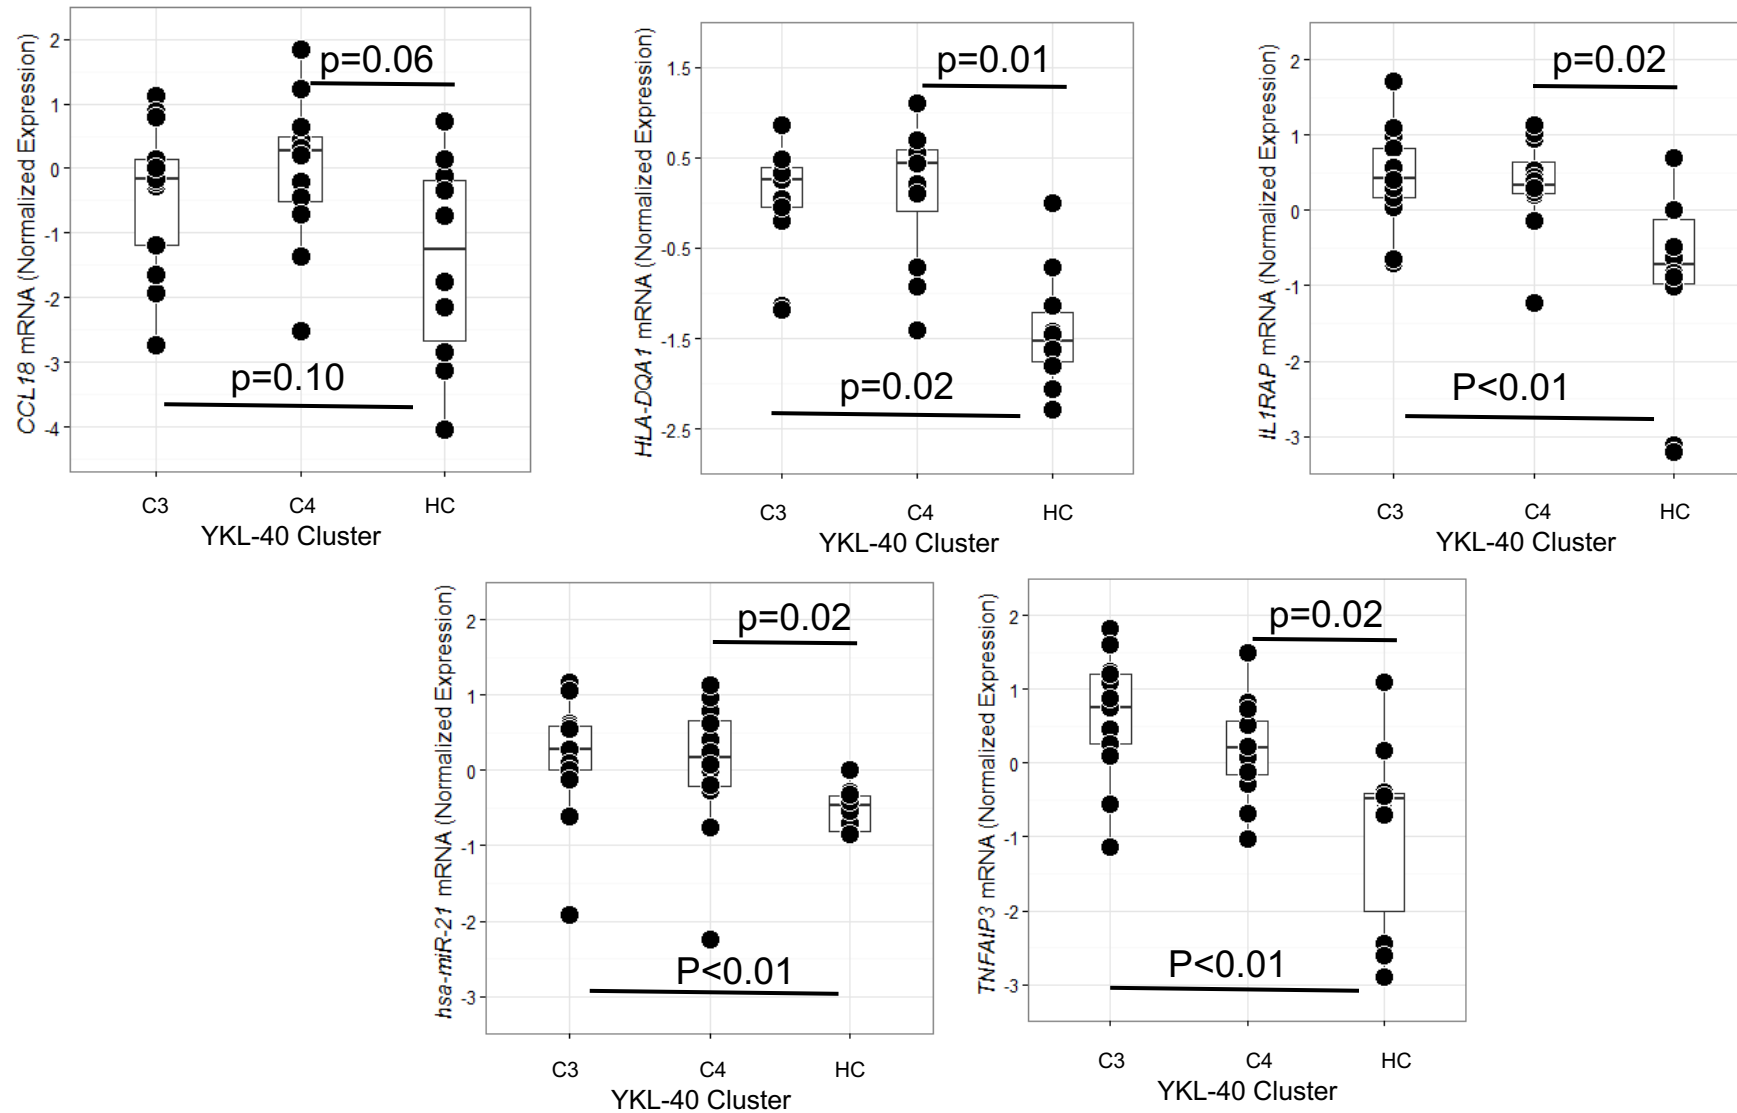

# Figure E3. Innate and Adaptive Immunity Transcripts in YKL-40 Asthma Cluster 3 vs Healthy Controls

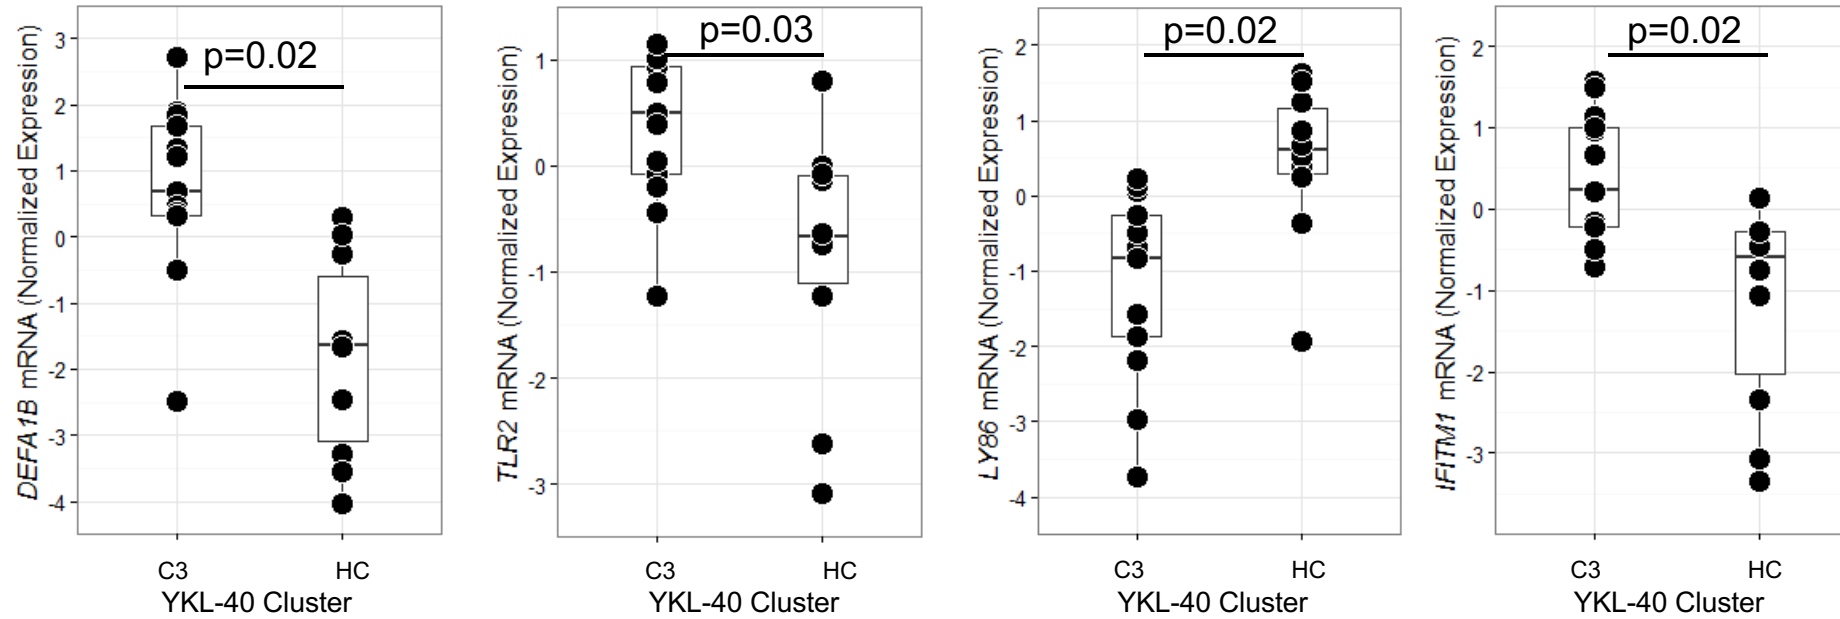

# Figure E4. Interleukin-18 (IL-18) Pathway Transcripts in YKL-40 Asthma Cluster 4 vs Healthy Controls

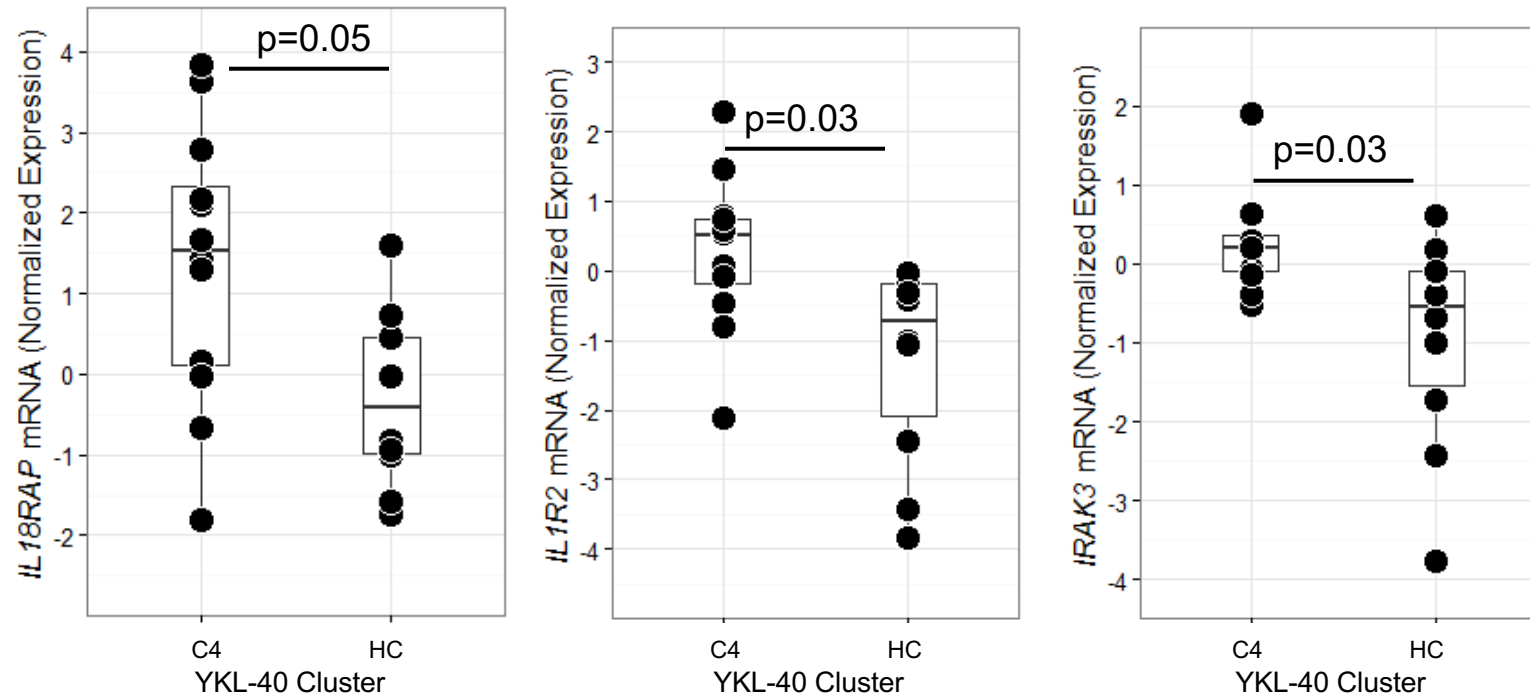

Supplement: inline-supplementary-material-2 [file inline-supplementary-material-2.pdf]
